# Supplementary material
Source: Research Square preprint supplement (doi:10.21203/rs.3.rs-8436668/v1)
Supplement: Supplementary file 1 [file 7794ccc5259399627a27207a.pdf]

## Appendix 1. Supplementary materials

**Supplementary table 1.** Composition of the study oral nutritional supplements (ONS)

| <b>Nutritional values</b>         | <b>Control ONS*<br/>per bottle (125ml)</b> | <b>Test ONS*<br/>per bottle (125 ml)</b> |
|-----------------------------------|--------------------------------------------|------------------------------------------|
| <b>Energy</b>                     | 1260 kJ / 300 kcal                         | 1256 kJ / 300 kcal                       |
| <b>Macronutrients</b>             |                                            |                                          |
| <b>Proteins</b>                   | 12 g (16 en%)                              | 12 g (16 en%)                            |
| <b>Fat</b>                        | 12 g (35 en%)                              | 13 g (39 en%)                            |
| <b>Carbohydrates</b>              | 37 g (49 en%)                              | 32 g (42 en%)                            |
| <b>Fibers (GOS/FOS/lvPect) **</b> | --                                         | 4.5 g (3 en%)                            |
| <b>Micronutrients</b>             |                                            |                                          |
| <b>Vitamins</b>                   |                                            |                                          |
| Vitamin A                         | 0.30 mg                                    | 0.29 mg                                  |
| Vitamin B1                        | 0.5 mg                                     | 0.5 mg                                   |
| Vitamin B2                        | 0.5 mg                                     | 0.6 mg                                   |
| Vitamin B3                        | 2.8 mg                                     | 2.7 mg                                   |
| Vitamin B5                        | 1.7 mg                                     | 1.8 mg                                   |
| Vitamin B6                        | 0.5 mg                                     | 0.6 mg                                   |
| Folic acid                        | 80 µg                                      | 77 µg                                    |
| Vitamin B12                       | 0.9 µg                                     | 0.9 µg                                   |
| Biotin                            | 12 µg                                      | 12 µg                                    |
| Vitamin C                         | 30 mg                                      | 30 mg                                    |
| Vitamin D                         | 2.3 µg                                     | 2.3 µg                                   |
| Vitamin E (α-TE)                  | 3.8 mg                                     | 3.8 mg                                   |
| Vitamin K                         | 16 µg                                      | 16 µg                                    |
| <b>Minerals</b>                   |                                            |                                          |
| Sodium                            | 120 mg                                     | 104 mg                                   |
| Potassium                         | 295 mg                                     | 286 mg                                   |
| Chlorine                          | 106 mg                                     | 103 mg                                   |
| Calcium                           | 220 mg                                     | 206 mg                                   |
| Magnesium                         | 41 mg                                      | 41 mg                                    |
| Iron                              | 4.8 mg                                     | 4.8 mg                                   |
| Zinc                              | 3.6 mg                                     | 3.6 mg                                   |
| Copper                            | 0.54 mg                                    | 0.54 mg                                  |
| Manganese                         | 1.0 mg                                     | 1.0 mg                                   |
| Fluorine                          | 0.22 mg                                    | 0.22 mg                                  |
| Molybdenum                        | 30 µg                                      | 30 µg                                    |
| Selenium                          | 17.5 µg                                    | 17.5 µg                                  |
| Chromium                          | 22 µg                                      | 20 µg                                    |
| Iodine                            | 45 µg                                      | 47 µg                                    |
| <b>Others</b>                     |                                            |                                          |
| Choline                           | 110 mg                                     | 101 mg                                   |

\* Both control ONS and test ONS are offered in two flavors (vanilla and strawberry) in blinded bottles

\*\* GOS: galacto oligosaccharides, FOS: fructo oligosaccharides, lyPect: low viscosity pectin

En%: energy percentage of total

**Supplementary table 2.** Trial registration dataset

| Data category                                        | Information                                                                                                                                                                                                                                                                                                                                                                                     |
|------------------------------------------------------|-------------------------------------------------------------------------------------------------------------------------------------------------------------------------------------------------------------------------------------------------------------------------------------------------------------------------------------------------------------------------------------------------|
| <b>Primary registry and trial identifying number</b> | This study is registered in the Dutch OMON database under NL86537.068.24                                                                                                                                                                                                                                                                                                                        |
| <b>Date of registration in primary registry</b>      | 1 August, 2024                                                                                                                                                                                                                                                                                                                                                                                  |
| <b>Source(s) of monetary or material support</b>     | TKI Agri & Food (LWV20.345)<br>Danone Global Research & Innovation Center                                                                                                                                                                                                                                                                                                                       |
| <b>Primary sponsor</b>                               | Maastricht University<br>GROW – Research Institute for Oncology and Reproduction, Maastricht University                                                                                                                                                                                                                                                                                         |
| <b>Secondary sponsor(s)</b>                          | -                                                                                                                                                                                                                                                                                                                                                                                               |
| <b>Contact for public queries</b>                    |                                                                                                                                                                                                                                                                                                                                                                                                 |
| <b>Contact for scientific queries</b>                |                                                                                                                                                                                                                                                                                                                                                                                                 |
| <b>Public title</b>                                  | PREBICC study                                                                                                                                                                                                                                                                                                                                                                                   |
| <b>Scientific title</b>                              | PREBICC: Prebiotic intervention in patients with advanced colorectal cancer treated with 5-FU-based chemotherapy: a randomized controlled clinical intervention study                                                                                                                                                                                                                           |
| <b>Countries of recruitment</b>                      | Netherlands                                                                                                                                                                                                                                                                                                                                                                                     |
| <b>Health condition(s) or problem(s) studied</b>     | Colorectal Cancer                                                                                                                                                                                                                                                                                                                                                                               |
| <b>Intervention(s)</b>                               | Active comparator: prebiotic fiber mixture ONS                                                                                                                                                                                                                                                                                                                                                  |
|                                                      | Placebo comparator: control ONS not containing prebiotic fiber mixture                                                                                                                                                                                                                                                                                                                          |
| <b>Key inclusion and exclusion criteria</b>          | Ages eligible for study: ≥18 years<br>Sexes eligible for study: both<br>Accepts healthy volunteers: no                                                                                                                                                                                                                                                                                          |
|                                                      | Inclusion criteria: Patients diagnosed with advanced CRC who will be treated with 5-FU-based therapy (FOLFOX, CAPOX, capecitabine monotherapy) with or without simultaneous treatment with bevacizumab, panitumumab, or cetuximab, provided that no systemic antibiotics are used (topical antibiotics are allowed), proficient use of the Dutch language, and performance (ECOG/WHO) score 0-2 |

| Data category                  | Information                                                                                                                                                                                                                                                                                                                                                                                                                                                                                                                                                                                                                                                                                                                                                                                                                                                                                                                                                                                                                                                                                                                                                                                                                                                                 |
|--------------------------------|-----------------------------------------------------------------------------------------------------------------------------------------------------------------------------------------------------------------------------------------------------------------------------------------------------------------------------------------------------------------------------------------------------------------------------------------------------------------------------------------------------------------------------------------------------------------------------------------------------------------------------------------------------------------------------------------------------------------------------------------------------------------------------------------------------------------------------------------------------------------------------------------------------------------------------------------------------------------------------------------------------------------------------------------------------------------------------------------------------------------------------------------------------------------------------------------------------------------------------------------------------------------------------|
|                                | <p>Exclusion criteria: microsatellite instability (MSI) and/or deficient mismatch repair (MMR) proteins, abnormal DPYD variants (single nucleotide polymorphisms) and/or reduced dihydropyrimidine dehydrogenase (DPD) enzyme function, presence of ileostomy, pregnancy or nursing, prior systemic therapy for advanced CRC (with (neo)adjuvant systemic therapy completed less than 6 months before the diagnosis of advanced disease), therapeutic systemic antibiotics used within four weeks prior to the start of 5-FU-based therapy (topical antibiotics are permitted), abdominal radiotherapy administered less than two weeks prior to the start of 5-FU-based therapy, use of pro- and/or prebiotics during the study period, inflammatory bowel disease including Crohn's disease and/or ulcerative colitis, simultaneous treatment with irinotecan chemotherapy, allergy to any ingredients in the test or control ONS requiring a fibre-free diet and/or suffering from galactosemia or lactose intolerance, participation in another medical-scientific intervention study simultaneously, physical or mental incapability or incompetence, and all conditions deemed unsuitable for study participation by the physician, such as severe renal failure.</p> |
| <b>Study type</b>              | Interventional                                                                                                                                                                                                                                                                                                                                                                                                                                                                                                                                                                                                                                                                                                                                                                                                                                                                                                                                                                                                                                                                                                                                                                                                                                                              |
|                                | Allocation: randomized intervention model. Parallel assignment masking: double blind (subject, caregiver, investigator, outcomes assessor)                                                                                                                                                                                                                                                                                                                                                                                                                                                                                                                                                                                                                                                                                                                                                                                                                                                                                                                                                                                                                                                                                                                                  |
|                                | Primary purpose: prevention                                                                                                                                                                                                                                                                                                                                                                                                                                                                                                                                                                                                                                                                                                                                                                                                                                                                                                                                                                                                                                                                                                                                                                                                                                                 |
| <b>Date of first enrolment</b> | September 2024                                                                                                                                                                                                                                                                                                                                                                                                                                                                                                                                                                                                                                                                                                                                                                                                                                                                                                                                                                                                                                                                                                                                                                                                                                                              |
| <b>Target sample size</b>      | 62                                                                                                                                                                                                                                                                                                                                                                                                                                                                                                                                                                                                                                                                                                                                                                                                                                                                                                                                                                                                                                                                                                                                                                                                                                                                          |
| <b>Recruitment status</b>      | Recruiting                                                                                                                                                                                                                                                                                                                                                                                                                                                                                                                                                                                                                                                                                                                                                                                                                                                                                                                                                                                                                                                                                                                                                                                                                                                                  |
| <b>Main outcome(s)</b>         | The differences in shifts ( $\Delta$ baseline vs end of study) of the relative abundance of specific microbial taxa (e.g. <i>Bifidobacterium</i> ), as well as of overall intestinal microbiota composition and diversity between test and control group.                                                                                                                                                                                                                                                                                                                                                                                                                                                                                                                                                                                                                                                                                                                                                                                                                                                                                                                                                                                                                   |
| <b>Exploratory outcomes</b>    | Parameters assessed in feces and blood, clinical parameters, tolerance parameters and other parameters as described in the study protocol.                                                                                                                                                                                                                                                                                                                                                                                                                                                                                                                                                                                                                                                                                                                                                                                                                                                                                                                                                                                                                                                                                                                                  |
